# Supplementary material for: Left ventricular myocardial work index and short-term prognosis in patients with light-chain cardiac amyloidosis: a retrospective cohort study
Source: PubMed Central journal article supplement — Quant Imaging Med Surg. 2022 Oct 21;13(1):133–44. doi: 10.21037/qims-22-386 (PMC9816762; doi:10.21037/qims-22-386), 2022-10-21
Supplement: qims-13-01-133-supplementary.pdf [file qims-13-01-133-supplementary.pdf]

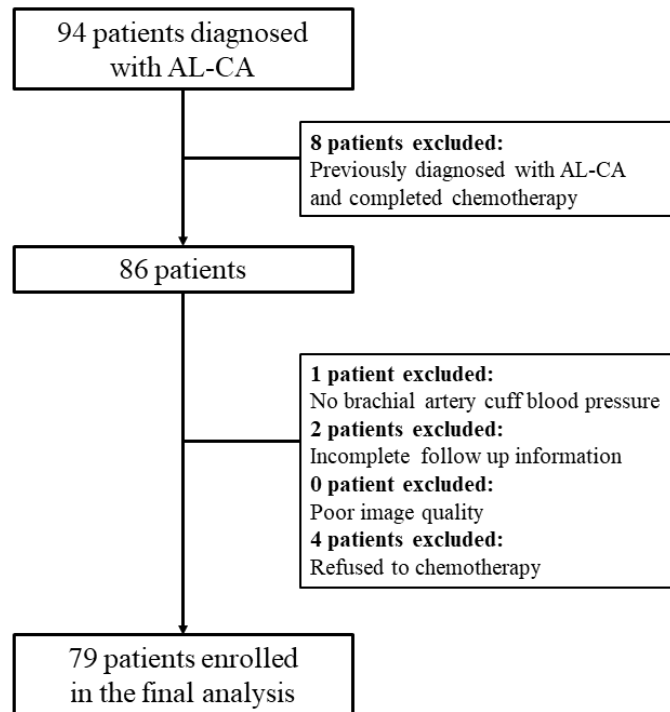

**Figure S1** Flowchart indicating patient selection for the present retrospective echocardiographic study. AL-CA, light-chain cardiac amyloidosis.

**Table S1** Correlation analysis between LVMWI and other characteristics

|                                           | Correlation coefficient | P      |
|-------------------------------------------|-------------------------|--------|
| Cardiac function                          |                         |        |
| Systolic pressure                         | 0.596                   | <0.001 |
| NYHA Class >II                            | -0.439                  | <0.001 |
| Abnormal natriuretic peptide <sup>a</sup> | -0.574                  | <0.001 |
| LVMWI                                     | -0.563                  | <0.001 |
| LAVI                                      | -0.322                  | 0.004  |
| E/e'                                      | -0.454                  | <0.001 |
| LVEF                                      | 0.610                   | <0.001 |
| TR gradient                               | -0.112                  | 0.324  |
| Relative regional work ratio              | -0.470                  | <0.001 |
| Type of light-chain                       | 0.107                   | 0.350  |
| Other laboratory characteristics          |                         |        |
| D-dimer                                   | -0.132                  | 0.246  |
| ALP                                       | 0.079                   | 0.491  |
| Cr                                        | -0.073                  | 0.525  |
| TBil                                      | -0.355                  | 0.001  |

<sup>a</sup>, n=72. LVMWI, left ventricular myocardial work index; NYHA, New York Heart Association; LVMI, left ventricular mass index; LAVI, left atrial volume index; E/e', ratio of peak early diastolic mitral inflow velocity to peak early diastolic mitral annular velocity; LVEF, left ventricular ejection fraction; TR, tricuspid regurgitation; ALP, alkaline phosphatase; Cr, creatinine; TBil, total bilirubin.

**Table S2** Multivariate logistic regression analysis to predict 6-month all-cause mortality (for LVMI, LAVI, E/e', Cr, and TBil)

|         | Multivariate OR (95% CI) | P      | The AUC of bivariate model |
|---------|--------------------------|--------|----------------------------|
| Model 1 |                          |        |                            |
| LVMWI   | 0.997 (0.995, 0.999)     | <0.001 |                            |
| LVMI    | 1.009 (0.996, 1.022)     | 0.179  | 0.805 (0.690, 0.920)       |
| Model 2 |                          |        |                            |
| LVMWI   | 0.997 (0.995, 0.999)     | 0.002  |                            |
| LAVI    | 1.038 (0.995, 1.082)     | 0.081  | 0.826 (0.720, 0.932)       |
| Model 3 |                          |        |                            |
| LVMWI   | 0.997 (0.995, 0.999)     | <0.001 |                            |
| E/e'    | 1.040 (0.971, 1.115)     | 0.259  | 0.805 (0.690, 0.920)       |
| Model 4 |                          |        |                            |
| LVMWI   | 0.996 (0.994, 0.998)     | <0.001 |                            |
| Cr      | 1.016 (1.002, 1.030)     | 0.021  | 0.855 (0.759, 0.950)       |
| Model 5 |                          |        |                            |
| LVMWI   | 0.996 (0.994, 0.998)     | 0.001  |                            |
| TBil    | 1.025 (0.996, 1.055)     | 0.086  | 0.843 (0.748, 0.939)       |

OR, odds ratio; CI, confidence interval; AUC, the area under the curve; LVMWI, left ventricular myocardial work index; LVMI, left ventricular mass index; LAVI, left atrial volume index; E/e', ratio of peak early diastolic mitral inflow velocity to peak early diastolic mitral annular velocity; Cr, creatinine; TBil, total bilirubin.

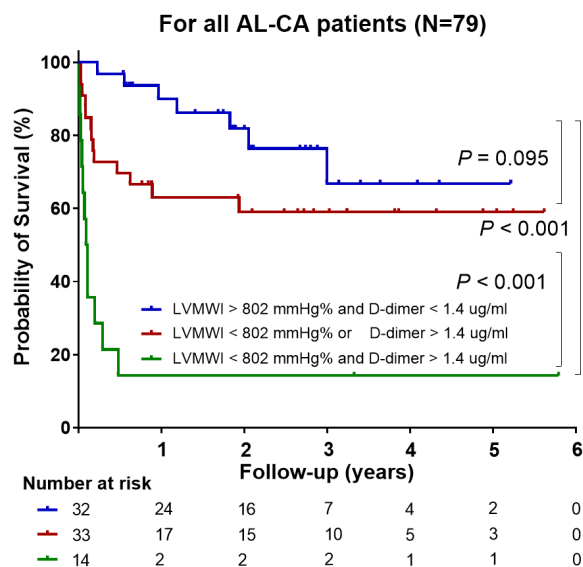

**Figure S2** Kaplan-Meier analysis depicting the time to cumulative mortality during the follow-up. AL-CA, light-chain cardiac amyloidosis; LVMWI, left ventricular myocardial work index.

**Table S3** The intra-observer variation of LVMWI

| Intra-observer variation | ICC                 |
|--------------------------|---------------------|
| LVMWI                    | 0.988 (0.956-0.997) |

LVMWI, left ventricular myocardial work indices; ICC, intraclass correlation coefficient.
